# Supplementary material for: Association of breast milk betaine and related metabolites with neurodevelopment in 6-month-old infants: a prospective birth cohort study
Source: Royal Society of Chemistry journal article supplement (doi:10.1039/d5fo04631a), 2026-01-01
Supplement: d5fo04631a2.pdf [file d5fo04631a2.pdf]

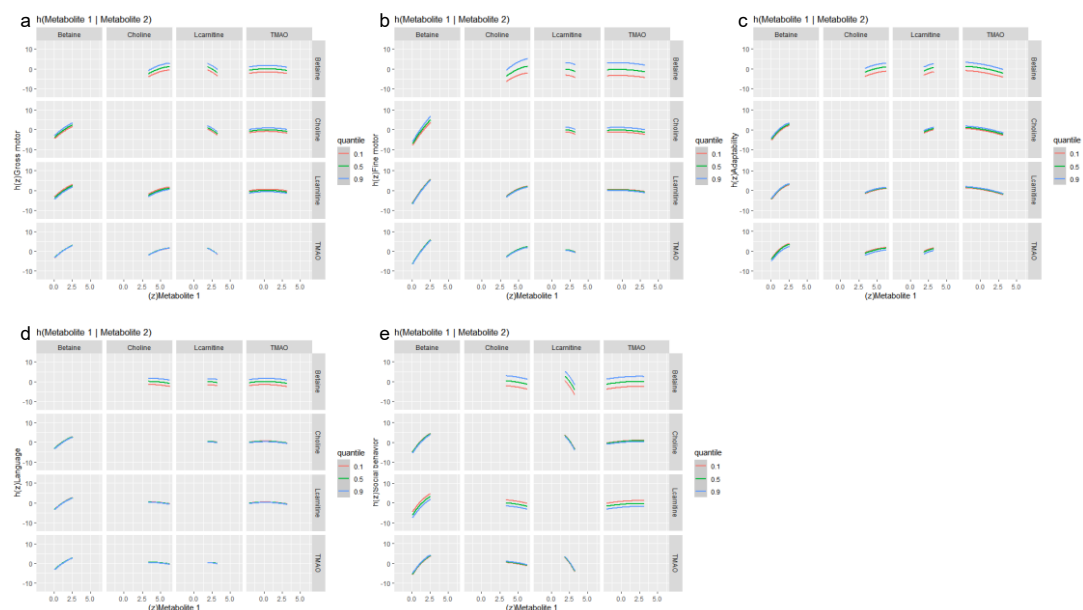

**Figure S1. Bivariate exposure-response relationships of each metabolite with the developmental quotient scores of each functional area of neurobehavior in offspring.** a: Gross motor; b: Fine motor; c: Adaptability; d: Language; e: Social behavior. Data were adjusted for control variables such as offspring sex, birth weight, gestational age at birth, only child or not, feeding mode, delivery mode, pregnancy type, maternal age, maternal pre-pregnancy BMI, paternal age, paternal BMI, maternal education level, paternal education level, quality of sleep during pregnancy and annual per capita household income.
